## Mediating Effect of Physical Activity on Relation between Cardio-respiratory Fitness and Physical Function Capacity of Older Adults

Eric A. Aloko<sup>1</sup>, Edward W. Ansah<sup>1</sup>, Daniel Apaak<sup>1</sup>, Emmanuel O. Sarpong<sup>2</sup>, Munkaila Seibu<sup>2</sup>, Stephen R. Sorkpor<sup>2</sup>

<sup>1</sup>Department of Health, Physical Education and Recreation, University of Cape Coast, cape Coast, Ghana

<sup>2</sup>Department of Health, Physical Education and Recreation, and Sports, University of Education, Winneba, Ghana

<sup>1</sup>Correspondence concerning this article should be addressed to Eric Ayine Aloko. [ealoko@stu.ucc.edu.gh](mailto:ealoko@stu.ucc.edu.gh) (Aloko E. A.) (<https://orcid.org/0009-0002-2242-6427>)

E-mails and ORCID:

[edward.ansah@ucc.edu.gh](mailto:edward.ansah@ucc.edu.gh) (Ansah, E.W.) (0000-0001-9450-7774)

[daniel.apaak@ucc.edu.gh](mailto:daniel.apaak@ucc.edu.gh) (Apaak D.) (<https://orcid.org/0000-0002-9114-0062>)

[eosarpong@uew.edu.gh](mailto:eosarpong@uew.edu.gh) (Sarpong E. O.) (<https://orcid.org/0000-0002-1316-4851>)

[mseibu@uew.edu.gh](mailto:mseibu@uew.edu.gh) (Munkaila S.) (<https://orcid.org/0000-0002-5131-7230>)

[rssorkpor@uew.edu.gh](mailto:rssorkpor@uew.edu.gh) (Sorkpor S. R.) (<https://orcid.org/0000-0001-9230-9926>)

### Abstract

*The ageing process is normally accompanied by several physiological changes like a decline in physical function and increased risk of chronic health conditions. In older adults, maintaining physical function and cardiovascular health is essential for maintaining independence and quality of life. Cardio-respiratory fitness and physical functional capacity (PFC) are two important indicators of physical health in older adults. This study aims to investigate the mediating effect of physical activity (PA) on the relationship between CRF and PFC in older adults. Using quantitative cross-sectional design, we employed a multistage sampling strategy to recruit 998 older adults from Navrongo for this study. The senior fitness test battery, international physical activity questionnaire (IPAQ) short form for elderly, weighing scale and tape measure were used to collect the data. The findings revealed that, 53.4% and 53.9% of these older adults had reduced PFC and CRF respectively. It was also found that PA partially mediates the relationship between CRF and PFC of the older adults with an indirect effect of CRF on PFC as  $\beta = .0030$ ,  $t = 1.579$   $p < .05$ , with a direct effect of CRF on PFC,  $\beta = .867$ ,  $t = 42.954$ ,  $p < .05$ , and the total effect,  $\beta = .872$ ,  $t = 43.110$ ,  $p < .05$ . We concluded that physical activity partially mediates the relationship between CRF and PFC among older adults in Navrongo. Therefore, there is the need for evidenced-based intervention to promote PA among these older adults to improve their PFC and quality of life.*

**Keywords:** *Older adults, cardio-respiratory fitness, physical function, physical activity, Ghana.*

## **Introduction**

### **Background**

Ageing is associated with a decline in physical function, which can negatively impact the quality of life of the aged (Nascimento et. al., 2022). According to Forman, Arena, Boxer, Dolansky, Eng, Fleg, and Shen (2017), cardio-respiratory fitness is an essential determinant of physical function in older adults, because it plays a crucial role in the maintenance of activities of daily living (ADLs). In order to maintain physical function in older persons, physical activity is also being recognized as a key element (Langhammer, Bergland, & Rydwik, 2018). Physical function refers to the ability of the individual to perform daily activities and tasks, such as walking, climbing stairs, and lifting objects, without experiencing undue fatigue or discomfort (Denteneer, Van Daele, Truijen, De Hertogh, Meirte, & Stassijns, 2018). Additionally, the ability to maintain physical function is essential for independent living, quality of life, and prevention of disability in older adults. Myers, Kokkinos, Arena and LaMonte (2021) espoused that, PA and cardio-respiratory fitness are important modifiable factors that contribute to physical function in older adults. Physical activity is any bodily movement produced by skeletal muscles that results in energy expenditure (World Health Organization, 2010), whereas cardio-respiratory function refers to the ability of the cardiovascular and respiratory systems to supply oxygen to the muscles during daily physical activity (Wu, 2022).

Several studies have demonstrated that physical activity is positively associated with physical function in older adults (Sales, Levinger, & Polman, 2017; Layne et al., 2017; Dugan, Gabriel, Lange-Maia, & Karvonen-Gutierrez, 2018). According to O'Neill, and Forman (2020), physical activity improves muscle strength, balance, and endurance, all of which are important determinants of physical function. In addition, physical activity

reduces the risk of chronic conditions, such as cardiovascular diseases, obesity, and diabetes, which in turn negatively impacts physical function in older adults. Cardio-respiratory function is a significant determinant of physical function in older adults (Kwok, So, Heywood, Lai, & Ng, 2022). Furthermore, cardio-respiratory function is positively associated with muscle strength, balance, and endurance, and has been shown to decline with age (Liguori et al., 2018). Additionally, low levels of cardio-respiratory function is associated with an increased risk of disability, chronic conditions, and increase mortality in older adults. The combined effect of physical activity and cardio-respiratory function on physical function has been studied extensively, with evidence suggesting that these factors have independent and additive effects on physical function capacity in older adults (Franklin, Wedig, Sallis, Lavie, & Elmer, 2023). However, the underlying mechanisms through which physical activity and cardio-respiratory function influence physical function are still not well understood (Omar, Pandey, Haykowsky, Berry, & Lavie, 2018).

It is estimated that Ghana would see a rapid increase in the ageing population, associated with a rise in non-communicable diseases (Bawah et al., 2016). Therefore, understanding the relationship between cardio-respiratory function, physical activity and physical function ability of older adults is essential for the development of appropriate interventions to promote healthy ageing. One potential mechanism through which physical activity may influence physical function is by mediating the relationship between cardio-respiratory function and physical function (Marques, Mota, Viana, Tuna, & Figueiredo, 2012). Despite the potential importance of physical activity as a mediator in cardio-respiratory function and physical function relation, few studies have explored such among older adults (Omar et al., 2018). Therefore, this study aims to investigate the mediating effect of physical activity on the relationship between cardio-respiratory function and physical functional capacity in older adults in Navrongo. It is hypothesized that, physical activity participation

mediates the relationship between cardio-respiratory function and physical functional capacity in older adults residing in Navrongo. The findings may provide insights into the potential mechanisms through which cardio-respiratory function and physical activity contribute to the maintenance of physical function capacity in older adults in Navrongo and inform the development of evidenced-based interventions to promote healthy ageing in this population.

## **Materials and Methods**

This study employed quantitative cross-sectional design to investigate the mediating effect of physical activity on the relationship between cardio-respiratory function and physical function capacity of older adults in Navrongo. One advantage of this design is that it is useful for providing a broad understanding of a population's characteristics, attitudes, or behaviors. It is also relatively easy and cost-effective to conduct, making it an attractive option for researchers (Wang, & Cheng, 2020).

We sampled 998 senior citizens, representing 60% of the total population (1663) from 1142 household, using a multistage sampling strategy. First of all, the stratified sampling technique was employed to put the entire population into two strata (male and female). The quota sampling was then employed to sample 60% from the male population (722) and 60% from the female population (941), given a sample of 433 males and 565 females. According to Vasileiou, Barnett, Thorpe, and Young, (2018), 60% and above sample size of a population is good representation of the entire population. In an instance where time is of essence and limited availability of resources, 60% of the population was ideal to generalize the findings of the sample to the larger group. According to Mafuure (2017), the quota sampling is a simple yet effective way to do research. With the quota sampling, the researcher must put the sample into mutually exclusive sub-groups then a quota is calculated from each sub-group. The merits of this sampling procedure are that, it is good

if the researcher is working within a limited time period. Additionally, it enhances the representation of any certain subgroup within the population, preventing these groupings from being over represented. (Sharma, 2017). However, the quota sampling may be prone to bias as the researcher is likely to assign a greater percentage to a particular group. But in order to be able to make proper comparison of the various sub-groups, the researcher will assign equal percentages to all sub-groups so that all groups will be equally represented. Navrongo is already grouped into four cardinal zones (North, South, East and West). The North, South, East and West comprises 7, 9, 7 and 6 suburbs respectively. The sample size for each stratum (433 males and 565 females) was divided into four and assigned to each zone making it 108 males and 141 females each for the following zones (North, East and West) except for South which comprised 109 males and 142 females. The suburbs from each zone were labelled S1-S7 for North zone, S1-S9 for South zone, S1-S7 for East zone and S1-S6 for West zone. The North and East with 7 suburbs each will be assigned 15 and 16 males each for the first 4 (S1-S4) and last 3 (S5-S7) suburbs respectively. Also, 20 and 21 females each came from the first 6 (S1-S6) and 7<sup>th</sup> (S7) suburb respectively. For the West zone with 6 suburbs, each suburb (S1-S6) was assigned 20 males, while 23 and 24 females each came from the first 3 (S1-S3) and last 3 (S4-S6) suburbs respectively. Finally, the North zone with 9 suburbs comprised 12 and 13 males each for first 8 (S1-S8) and last 1 (S9) suburb respectively. While, 15 and 16 females each came from the first 2 (S1-S2) and the final 7 (S3-S7) suburbs respectively.

Five research assistants were assigned to each zone. Since there was no available data on the number of older persons in the various households, the research assistance visited the various suburbs and houses in each zone to conveniently sample as many as were available until the required number of males and females for each suburb was attained to give a total sample of 433 males and 565 females.

## **Setting**

The Kasena Nankana Municipal is one of Ghana's 260 Metropolitan, Municipal and District Assemblies (MMDAs) and is a member of the Upper East Region's fifteen (15) Municipalities and Districts, with Navrongo serving as the regional administrative center. Within the Guinea Savannah woods is Navrongo. Between latitudes 11°10' and 10°3' North and longitude 10°1' West is about where it is situated. The town shares boundaries with Paga and Bolgatanga, Sandema. However, it is also bounded to the north of the Ghana by Burkina Faso. The number of household in Navrongo stood at 32,000 with a total population 109, 944 with 53,676 males and 56,268 females (Ghana Statistical Service, 2013). The main occupation of the people in the Municipality is farming and trading. The built environment of the Municipality is not exercise friendly. Also, there exist a poor culture towards meaningful physical activity and exercise in the Municipality. Hence, sedentary living is gradually becoming an order of the day in the Kassena Nankana Municipality.

## **Instruments**

We used instruments adopted from four preexisting instruments, namely, the Senior Fitness (Functional Fitness Test) battery, Omron weighing scale, tape measure, and international physical activity questionnaire (IPAQ) Elderly short form. Rikli and Jones created the Senior Fitness Test battery as part of Fullerton University's lifelong wellness programme. The test is frequently referred to as the Fullerton Functional Test as a result. It is a straightforward, user-friendly battery of tests that evaluates older individuals' functional fitness. The test is easy to understand and effectively test the aerobic fitness, strength and flexibility among adults, using minimal and inexpensive equipment. Within the test battery are specific tests and their reliability coefficients; “chair stand test (.88), arm curl test (.79), sit and reach test (.81), back scratch test (.82), up and go test (.84) and 2-minute step up test

(.81)” and a composite reliability of .83 for PFC (Rikli & Jones, 2013). Reliability coefficients estimated based on the current study are .79, .80, .77, .78, .80, .79 for chair stand test, arm curl test, sit and reach test, back scratch test, up and go test and 2-minute step up test respectively.

The IPAQ-Elderly short form was used to measure the physical activity levels of older adults in Navrongo. This instrument was tested in six centers involving 12 countries across all continents and a reliability and validity values of .81 and .84 were reported under Africa (Bădicu, 2018; Craig et al., 2003). The current study also reports a reliability of .79 for the instrument.

### **Procedure**

Ethical clearance was granted (ID-UCCIRB/CES/2022/30). To collect the data, permission was sought from household heads and the participants and the purpose of the study well explained to them.

A consent form was included in the IPAQ-Short form instrument. Participants read the form and consented by signing the consent form. Participants who could not read nor write, consent was orally explained to them and those who agreed to take part in the study thumb printed the consent form to give their approval. For inclusion criteria, only older adults who could walk and raise their upper limbs were considered for this study.

Participants were also assured of confidentiality of their information. Also, for purposes of anonymity, names of participants names were not taken.

First aiders were on standby during the fitness test to take care of any eventualities. Data was collected from participants at their homes. Physical function capacity for each participant was assessed through the five physical functional test batteries. To assess physical activity levels of each participant, IPAQ elderly short form was used and each participant indicated the number of days per week they walked, did moderate and vigorous

activities or the amount of time they spent doing such activities. The 2-minute step-up test was used to assess cardio-respiratory endurance. A 2-minute test is conducted by marking the equivalent midpoint between the iliac crest and knee cap on a wall, and then, under instruction from the tester, the participant quickly steps up (lifts) each knee to the level of the mark on the wall. Each participant's total number of step-ups within two minutes is noted. The data were collected between August and December, 2022 between 8 AM and 4 PM during weekends when the participants were likely to be at home.

### **Data Analysis**

Statistical Package for Social Science, IBM, version 25 for windows was used to manage the data which went through a thorough screening process before statistical analysis. A test for normality and linearity were also carried out. Demographic data of gender was analysed using frequency and percentages. Physical function capacity and cardio-respiratory function levels of older adults were analysed using frequency and percentages, because it helps to describe the portion of respondents measured on a categorical scale (Mishra et al., 2019). PFC levels were categorised as poor and improved. CRE was also categorized as low and recommended. Finally, multiple linear regression using PROCESS macro was computed to determine the mediating effect of physical activity on cardio-respiratory function and physical function capacity of the older adults. All the variables were measured on a continuous scale and the results were reported on the direct effect, indirect effect and total effect.

### **Results**

Frequency and percentages were used to display the cardio-respiratory function and physical function capacity levels of older adults in Navrongo. The level of cardio-respiratory function below the mean score of 61 steps-ups are considered poor and 61 and above step-ups are considered high and that such aged is meeting recommended cardio-respiratory



function levels. Also, physical function capacity levels below the mean score of 90 are considered poor and above the mean are considered improved physical function capacity (see Table for details).

Demographic characteristics of participants was obtained using frequency and percentages

**Table 1: Data showing number of males and females in the study**

| Variable | Frequency | Percentage |
|----------|-----------|------------|
| Male     | 565       | 56.6%      |
| Female   | 433       | 43.4%      |

Table 1 above showed that, there were 565 males representing 56.6% and 433 females representing 43.4%.

**Table 2: Results showing CRF and PFC levels of Older Adults in Navrongo**

| CRF Range                | Description | Frequency | Percentage (%) |
|--------------------------|-------------|-----------|----------------|
| (< 60 step-up/2 minutes) | Poor        | 533       | 53.4%          |
| (> 60 step-up/2 minutes) | Recommended | 465       | 46.6%          |
| PFC Range                |             |           |                |
| (< 90)                   | Poor        | 538       | 53.9%          |
| (> 90)                   | Improved    | 460       | 46.1%          |

To determine the mediating effect of physical activity participation on the relationship between cardio-respiratory function and physical function capacity levels, a simple mediation analysis was conducted using the regression model. The mediation model used PROCESS macro for SPSS (2022) model, at an alpha of .05. The mediation model was generally statistically significant,  $F(1, 996) = 1858.5, p < .05$ , and that cardio-respiratory function significantly influenced physical activity participation ( $\beta = .847, t = 2.089, p < .05$ ), while, physical activity also significantly predicted physical function capacity of the older adults ( $\beta = .004, t = 2.238, p < .05$ ). The direct effect of cardio-respiratory function on physical function capacity was also statistically significant ( $\beta = .867, t = 42.954, p < .05$ )

and the indirect effect of CRF on PFC ( $\beta = .0030$ ,  $t = 1.579$   $p < .05$ ). Also, the total effect was also significant ( $\beta = .872$ ,  $t = 43.110$ ,  $p < .05$ ). Hence, PA partially mediates the relationship between CRF and PFC of older adults in Navrongo (see Table 2 for details).

**Table 3: Mediation Analysis of the Effect of PA on the Relationship Between CRF and PFC of Older Adults in Navrongo**

| Variable        | Coefficient | Standard Error | 95% Confidence Interval  |                          | t-value | p-value |
|-----------------|-------------|----------------|--------------------------|--------------------------|---------|---------|
|                 |             |                | Lower Bound <sup>a</sup> | Upper Bound <sup>a</sup> |         |         |
| Direct effect   | .867        | .0202          | .829                     | .908                     | 42.954  | <.05    |
| Indirect effect | .0030       | .0018          | .000                     | .007                     | 1.579   | <.05    |
| Total effect    | .872        | .0202          | .832                     | .911                     | 43.110  | <.05    |

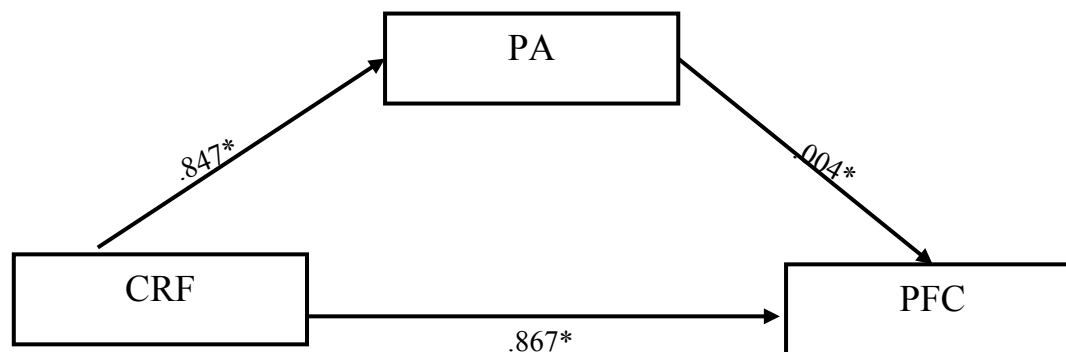

**Figure 1: Mediation Effect of PA on the Relationship Between CRF and PFC of Older Adults in Navrongo**

*Keys: CRF = cardio-respiratory function; PA = physical activity; PFC = physical function capacity*

### Discussions

The findings suggest that older adults in Navrongo had poor cardio-respiratory endurance levels as well as poor physical function capacity. Moreover, physical activity was found to partially mediate the relationship between cardio-respiratory endurance and physical function capacity among these older adults.

The indication of poor cardio-respiratory endurance levels of these older adults calls for a concern because it highlights a potential risk including age-related decline in physical

function, independence, and overall quality of life. The fact that 53.4% of older adults in this study recorded low cardio-respiratory endurance levels is particularly alarming, as low cardio-respiratory function has been associated with a range of negative health outcomes among older adults, including cardiovascular disease, metabolic disorders, and cognitive decline (Myers, Kokkinos, Arena, & LaMonte, 2021). Such a low cardio-respiratory function levels may be attributed to several factors, including a sedentary lifestyle, poor nutrition, and associated chronic health conditions (Després, 2016). Additionally, older adults in Navrongo are more likely to lead sedentary lifestyles due to cultural factors, lack of access to physical activity resources, or limited knowledge about the benefits of exercise. According to Romero-Gómez, Zelber-Sagi, and Trenell (2017), poor nutrition, including inadequate caloric intake or nutrient deficiencies contribute to low cardio-respiratory endurance levels, because nutrition plays a critical role in supporting physical activity and exercise for health.

Chronic health conditions, such as CVDs, respiratory and metabolic disorders may further contribute to low cardio-respiratory function levels in older adults (Wang, & Ren, 2018). Furthermore, these conditions can impair oxygen uptake and utilization, making it more difficult for older adults to engage in meaningful physical activity and exercise. Moreover, chronic health conditions can lead to muscle wasting and decreased muscle strength, which further exacerbate declines in cardio-respiratory function of older adults. Thus, interventions aimed at improving cardio-respiratory function levels in older adults in Navrongo should focus on addressing these underlying risk factors. This may involve implementing community-based exercise programmes, promoting healthy eating habits, and providing access to healthcare services for the management of chronic health conditions (Suarez-Balcazar et. al., 2018). Additionally, educational campaigns aimed at increasing awareness about the benefits of exercise and physical activity in older adults

may help to increase participation in these activities (McPhee et al., 2016). By promoting regular exercise and physical activity options, improving nutrition, and appropriately managing chronic health conditions, cardio-respiratory function may improve to promote better health outcomes among the older adults (Fletcher, Landolfo, Niebauer, Ozemek, Arena, & Lavie, 2018).

The finding again indicates that more than half (53.9%) of older adults in Navrongo recorded poor physical function capacity. Poor physical function capacity is a strong predictor of disability, falls, hospitalization, and mortality in older adults, and can significantly reduce their quality of life. The fact that such a high percentage of older adults in this study recorded poor physical function capacity highlights the need for evidenced-based interventions aimed at improving physical function in this population (Shimizu, Umemura, Matsunaga, & Hirai, 2018). Poor physical function capacity can be attributed to age-related declines in muscle strength, endurance, and flexibility, as well as chronic health conditions, because of environmental factors such as inadequate exercise facilities. Fragala et al. (2019) are of the view that as people age, they experience decline in muscle mass and function, which contribute to reduce mobility, balance, and overall physical function. According to Armstrong and Vogiatzis (2019), many age-related chronic health can also impair physical function by limiting oxygen uptake and utilization, reducing muscle strength, and causing fatigue.

Furthermore, environmental factors such as lack of physical activity facility including space further exacerbate sedentariness that in turn increase poor physical function capacity in these older adults (Lord & Close, 2018). For instance, inadequate healthcare services can result in the underdiagnose and under treatment of chronic health conditions, while limited access to physical activity resources make it difficult for older adults to engage in regular exercise (Armstrong & Vogiatzis, 2019). Thus, initiatives focused on improving physical

function capacity in these older adults should aim at addressing these underlying risk factors (Anderson-Hanley et al., 2018). Additionally, there may be the need to implement community-based exercise programmes that focus on improving muscle strength, endurance, and flexibility, promoting healthy eating habits, and providing access to healthcare services for the management of chronic health conditions. Moreover, providing older adults with access to safe and supportive environments that promote physical activity can help to improve physical function capacity of these older adults. Generally, by addressing the underlying risk factors associated with poor physical function capacity, better health outcomes and improve the overall quality of life in this population are possible (Perpiñá-Galvañ et al., 2019).

The findings further support the hypothesis that physical activity participation mediates the relationship between cardio-respiratory endurance and physical function capacity levels in the older adults. The current finding demonstrate a significant relationship between cardio-respiratory function and physical function capacity, just as previous research (Harber et al., 2017). However, the novel contribution of this study is that it highlights the mediating role of physical activity, thus, reducing rate at which poor cardio-respiratory function compromise physical function capacity among these older adults (Tomás, Galán-Mercant, Carnero, & Fernandes, 2018). Thus, the more the older adults engage in physical activities including exercise, the more likely it is that their cardio-respiratory function will improve, which in turn promotes their physical function capacity.

We further found that cardio-respiratory function levels play important role in determining the level of physical activity participation (Edholm, Nilsson, & Kadi, 2019), which in turn impacts physical function in older adults (Laddu, Paluch, & LaMonte, 2021). This reinforces the importance of maintaining high levels of cardio-respiratory function via regular exercise. The direct effect of cardio-respiratory function on physical function

capacity was also highlight the importance of cardio-respiratory function as a predictor of physical function in these older adults. This finding is consistent with previous research that demonstrated the importance of cardio-respiratory function in maintaining physical function capacity and independence in older adults (O'Neill, & Forman, 2020).

Overall, the results of the current study provide important insights into the relationship between cardio-respiratory function, physical activity participation, and physical function ability in older adults residing in Navrongo. The findings suggest that interventions aimed at improving physical function in older adults need to focus on promoting regular exercise, particularly in individuals with low levels of cardio-respiratory function (Izquierdo et al., 2021). Moreover, the results emphasize the importance of maintaining high levels of cardio-respiratory function through regular exercise and activity participation that promote physical function capacity and independence among these older adults.

### **Limitations**

Older persons' physical functioning capacity may also be impacted by other factors like food, health issues, and drug use. The link between body weight, cardiovascular endurance, and physical functioning may therefore, be complicated by these uncontrolled variables. In an effort to study the mediating effect of physical activity on the relationship between cardio-respiratory function and physical function capacity of older persons, several of these confounding variables must therefore, be controlled.

### **Practical Implications**

The mediation model suggests a substantial correlation between older adults' cardio-respiratory function, physical activity, and physical function capacity of these older adults. Accordingly, cardio-respiratory function positively affects physical function capacity both directly and indirectly through physical activity. Thus, raising cardio-respiratory function by consistent exercise can enhance older adults' physical functional abilities.

The results also highlight the importance of considering both cardio-respiratory function and physical activity when designing interventions aimed at improving physical function capacity levels of these older adults. Thus, interventions that focus on one factor may not be as effective as interventions that address both or multiple factors. Overall, the mediation model provides important insights into the complex relationship between cardio-respiratory function, physical activity participation, and physical function capacity among these older adults. Such understanding should inform the development of effective interventions to improve physical function capacity among older adult population.

### **Conclusions**

Older adults in Navrongo recorded poor cardio-respiratory function levels as well as poor physical function and physical activity levels. Moreover, physical activity participation was found to partially mediate the relationship between cardio-respiratory endurance and physical function capacity of the older adults. These findings are an indication that these older adults are susceptible to heart-related diseases that might compromise or deteriorate their physical function capacity, thus creating poor quality of life among them. Therefore, an immediate evidence-based exercise intervention is required to attenuate the health consequences associated with poor cardio-respiratory function and poor physical function capacity among the older adults of Navrongo. These older adults are therefore recommended to engage in aerobic endurance activities as well as balance and strength training. Besides, creating an exercise-friendly community with adequate security would encourage exercise behavior among these older adults.

### **Declarations**

**Ethics approval and consent to participate:** Ethical clearance and approval were sought (ID-UCCIRB/CES/2022/30) for this study. all participants who consented to take part in this study duly signed or thumb printed a consent form provided to them.

**Consent for Publication:** Informed consent was obtained from all subjects involved in the study. Participants and the heads of households were duly informed and they gave consent and approval that results and findings from this study could be published.

**Data Availability Statement:** The datasets generated and/or analysed during the current study are available in the Open Science Framework, and it is here: <https://osf.io/zvdb2>

**Competing Interest:** Authors declare that they have no competing interest.

**Funding:** The study received no external funding

**Author Contributions:** Conceptualization and study design: EAA and EWA. Methodology: EAA, EWA, EOS, and MS, Data collection: EAA, EWA, EOS, DA, and SRS, Data analysis: EAA and EWA, Writing - initial manuscript: EAA, Writing - final manuscript: EAA and EWA (with critical feedback provided by EOS, MS, and SRS and DA, Editing and review). All authors edited and considerably reviewed the manuscript, proofread for intellectual content and consented to its publication.

**Acknowledgements:** The authors thank the people of Navrongo for their cooperation.

## References

- Anderson-Hanley, C., Barcelos, N. M., Zimmerman, E. A., Gillen, R. W., Dunnam, M., Cohen, B. D., & Kramer, A. F. (2018). The aerobic and cognitive exercise study (ACES) for community-dwelling older adults with or at-risk for mild cognitive impairment (MCI): Neuropsychological, neurobiological and neuroimaging outcomes of a randomized clinical trial. *Frontiers in Aging Neuroscience, 10*, 76.
- Armstrong, M., & Vogiatzis, I. (2019). Personalized exercise training in chronic lung diseases. *Respirology, 24*(9), 854-862.
- Bădicu, G., & Balint, L. (2018). The role of leisure sports activities on physical fitness in adults. *Gazzetta Medica Italiana Archivio per le Scienze Mediche, 177*(5), 193-7.
- Bawah, A., Houle, B., Alam, N., Razzaque, A., Streatfield, P. K., Debpuur, C., & Clark, S. J. (2016). The evolving demographic and health transition in four low-and middle-income countries: Evidence from four sites in the INDEPTH network of longitudinal health and demographic surveillance systems. *PloS One, 11*(6), e0157281.
- Cohen, J. A., Verghese, J., & Zwerling, J. L. (2016). Cognition and gait in older people. *Maturitas, 93*, 73-77.
- Craig, C. L., Marshall, A. L., Sjöström, M., Bauman, A. E., Booth, M. L., Ainsworth, B. E., & Oja, P. (2003). International physical activity questionnaire: 12-country



reliability and validity. *Medicine and Science in Sports and Exercise*, 35(8), 1381-1395

- Denteneer, L., Van Daele, U., Truijen, S., De Hertogh, W., Meirte, J., & Stassijns, G. (2018). Reliability of physical functioning tests in patients with low back pain: A systematic review. *The Spine Journal*, 18(1), 190-207.
- Després, J. P. (2016). Physical activity, sedentary behaviours, and cardiovascular health: When will cardiorespiratory fitness become a vital sign? *Canadian Journal of Cardiology*, 32(4), 505-513.
- Di Russo, F. (2022). Benefits of a cognitive-motor dual-task intervention on anxiety and depression, and on cognitive functions and functional fitness in elderly: A pilot study.
- Dugan, S. A., Gabriel, K. P., Lange-Maia, B. S., & Karvonen-Gutierrez, C. (2018). Physical activity and physical function: moving and aging. *Obstetrics and Gynecology Clinics*, 45(4), 723-736.
- Edholm, P., Nilsson, A., & Kadi, F. (2019). Physical function in older adults: impacts of past and present physical activity behaviors. *Scandinavian Journal of Medicine & Science in Sports*, 29(3), 415-421.
- Fletcher, G. F., Landolfo, C., Niebauer, J., Ozemek, C., Arena, R., & Lavie, C. J. (2018). Promoting physical activity and exercise: JACC health promotion series. *Journal of the American College of Cardiology*, 72(14), 1622-1639.
- Forman, D. E., Arena, R., Boxer, R., Dolansky, M. A., Eng, J. J., Fleg, J. L., & Shen, W. K. (2017). Prioritizing functional capacity as a principal end point for therapies oriented to older adults with cardiovascular disease: A scientific statement for healthcare professionals from the American Heart Association. *Circulation*, 135(16), e894-e918.
- Fragala, M. S., Cadore, E. L., Dorgo, S., Izquierdo, M., Kraemer, W. J., Peterson, M. D., & Ryan, E. D. (2019). Resistance training for older adults: position statement from the national strength and conditioning association. *The Journal of Strength & Conditioning Research*, 33(8).
- Franklin, B. A., Wedig, I. J., Sallis, R. E., Lavie, C. J., & Elmer, S. J. (2023, February). Physical activity and cardiorespiratory fitness as modulators of health outcomes: A compelling research-based case presented to the medical community. In *Mayo Clinic Proceedings* (Vol. 98, No. 2, pp. 316-331). Elsevier.

- Ghana. Statistical Service. (2010). *2010 population & housing census: National analytical report*. Ghana Statistics Service.
- Harber, M. P., Kaminsky, L. A., Arena, R., Blair, S. N., Franklin, B. A., Myers, J., & Ross, R. (2017). Impact of cardiorespiratory fitness on all-cause and disease-specific mortality: advances since 2009. *Progress in Cardiovascular Diseases*, *60*(1), 11-20.
- Izquierdo, M., Merchant, R. A., Morley, J. E., Anker, S. D., Aprahamian, I., Arai, H., ... & Singh, M. F. (2021). International exercise recommendations in older adults (ICFSR): Expert consensus guidelines. *The Journal of Nutrition, Health & Aging*, *25*(7), 824-853.
- Kwok, M. M., So, B. C., Heywood, S., Lai, M. C., & Ng, S. S. (2022). Effectiveness of deep water running on improving cardiorespiratory fitness, physical function and quality of life: A systematic review. *International Journal of Environmental Research and Public Health*, *19*(15), 9434.
- Laddu, D., Paluch, A. E., & LaMonte, M. J. (2021). The role of the built environment in promoting movement and physical activity across the lifespan: Implications for public health. *Progress in Cardiovascular Diseases*, *64*, 33-40.
- Langhammer, B., Bergland, A., & Rydwik, E. (2018). The importance of physical activity exercise among older people. *BioMed Research International*, *2018*.
- Layne, A. S., Hsu, F. C., Blair, S. N., Chen, S. H., Dungan, J., Fielding, R. A., ... & Kaplan, R. M. (2017). Predictors of change in physical function in older adults in response to long-term, structured physical activity: The LIFE Study. *Archives of Physical Medicine and Rehabilitation*, *98*(1), 11-24.
- Liguori, I., Russo, G., Curcio, F., Bulli, G., Aran, L., Della-Morte, D., & Abete, P. (2018). Oxidative stress, aging, and diseases. *Clinical Interventions in Aging*, *757-772*.
- Lord, S. R., & Close, J. C. (2018). New horizons in falls prevention. *Age and ageing*, *47*(4), 492-498.
- Mafuure, R. (2017). *An investigation into the causes of university campus crime: A case study of National University of Science and Technology (NUST) main campus* (Doctoral dissertation, BUSE).
- Marques, E. A., Mota, J., Viana, J. L., Tuna, D., & Figueiredo, P. (2012). The mediating role of cardiorespiratory fitness on the relationship between physical activity and

- executive function in older adults. *European Review of Aging and Physical Activity*, 9(2), 119-126. <https://doi.org/10.1007/s11556-012-0091-1>
- McPhee, J. S., French, D. P., Jackson, D., Nazroo, J., Pendleton, N., & Degens, H. (2016). Physical activity in older age: perspectives for healthy ageing and frailty. *Biogerontology*, 17, 567-580.
- Myers, J., Kokkinos, P., Arena, R., & LaMonte, M. J. (2021). The impact of moving more, physical activity, and cardiorespiratory fitness: Why we should strive to measure and improve fitness. *Progress in Cardiovascular Diseases*, 64, 77-82.
- Nascimento, M. D. M., Gouveia, É. R., Marques, A., Gouveia, B. R., Marconcin, P., França, C., & Ihle, A. (2022). The role of physical function in the association between physical activity and gait speed in older adults: A mediation analysis. *International journal of Environmental Research and Public Health*, 19(19), 12581.
- Omar, W., Pandey, A., Haykowsky, M. J., Berry, J. D., & Lavie, C. J. (2018). The evolving role of cardiorespiratory fitness and exercise in prevention and management of heart failure. *Current Heart Failure Reports*, 15, 75-80.
- O'Neill, D., & Forman, D. E. (2020). The importance of physical function as a clinical outcome: Assessment and enhancement. *Clinical Cardiology*, 43(2), 108-117.
- Perpiñá-Galvañ, J., Orts-Beneito, N., Fernández-Alcántara, M., García-Sanjuán, S., García-Caro, M. P., & Cabañero-Martínez, M. J. (2019). Level of burden and health-related quality of life in caregivers of palliative care patients. *International Journal of Environmental Research and Public Health*, 16(23), 4806.
- Rikli, R., & Jones, C. J. (2013) *Senior Fitness Test Manual*. Rikli R, Jones CJ, editors. Champaign, IL: Human Kinetics (2013).
- Romero-Gómez, M., Zelber-Sagi, S., & Trenell, M. (2017). Treatment of NAFLD with diet, physical activity and exercise. *Journal of Hepatology*, 67(4), 829-846.
- Sales, M., Levinger, P., & Polman, R. (2017). Relationships between self-perceptions and physical activity behaviour, fear of falling, and physical function among older adults. *European Review of Aging and Physical Activity*, 14(1), 1-10.
- Sharma, G. (2017). Pros and cons of different sampling techniques. *International Journal of Applied Research*, 3(7), 749-752.
- Shimizu, N., Umemura, T., Matsunaga, M., & Hirai, T. (2018). Effects of movement music therapy with a percussion instrument on physical and frontal lobe function in older

- adults with mild cognitive impairment: a randomized controlled trial. *Aging & Mental Health*, 22(12), 1614-1626.
- Suarez-Balcazar, Y., Early, A., Maldonado, A., Garcia, C. P., Arias, D., Zeidman, A., & Agudelo-Orozco, A. (2018). Community-based participatory research to promote healthy lifestyles among Latino immigrant families with youth with disabilities. *Scandinavian Journal of Occupational Therapy*, 25(5), 396-406.
- Tomás, M. T., Galán-Mercant, A., Carnero, E. A., & Fernandes, B. (2018). Functional capacity and levels of physical activity in aging: A 3-year follow-up. *Frontiers in medicine*, 4, 244.
- Vasileiou, K., Barnett, J., Thorpe, S., & Young, T. (2018). Characterising and justifying sample size sufficiency in interview-based studies: Systematic analysis of qualitative health research over a 15-year period. *BMC Medical Research Methodology*, 18, 1-18.
- Wang, S., & Ren, J. (2018). Obesity paradox in aging: from prevalence to pathophysiology. *Progress in Cardiovascular Diseases*, 61(2), 182-189.
- Wang, X., & Cheng, Z. (2020). Cross-sectional studies: strengths, weaknesses, and recommendations. *Chest*, 158(1), S65-S71.
- World Health Organization. (2010). Global recommendations on physical activity for health. Geneva: World Health Organization. [https://www.who.int/publications/i/item/9789241\\_599979](https://www.who.int/publications/i/item/9789241_599979)
- Wu, J. P. (2022). Swimming exercise-induced improvements in cardiorespiratory fitness (CRF) are Caused by Nitric Oxide Functional Adaptations in the Oxygen Transport System.
